# Supplementary material for: Incorporating a vertical BDT unit in conjugated polymers for drastically improving the open-circuit voltage of polymer solar cells
Source: Royal Society of Chemistry journal article supplement (doi:10.1039/c5nj03717d), 2016-01-01
Supplement: c5nj03717d1.pdf [file c5nj03717d1.pdf]

## Supporting Information

Incorporating vertical BDT unit in conjugated polymers for drastically  
improving open-circuit voltage of polymer solar cell

Shuguang Wen,<sup>a</sup> Manjun Xiao,<sup>a</sup> Wenfei Shen,<sup>a,b</sup> Chuantao Gu,<sup>a</sup> Dangqiang Zhu<sup>a</sup> and  
Renqiang Yang<sup>a\*</sup>

<sup>a</sup> CAS Key Laboratory of Bio-based Materials, Qingdao Institute of Bioenergy and  
Bioprocess Technology, Chinese Academy of Sciences, Qingdao 266101, China. E-  
mail: [yangrq@qibebt.ac.cn](mailto:yangrq@qibebt.ac.cn)

<sup>b</sup> Institute of Hybrid Materials, Laboratory of New Fiber Materials and Modern  
Textile-The Growing Base for State Key Laboratory, Qingdao University, Qingdao  
266071, China

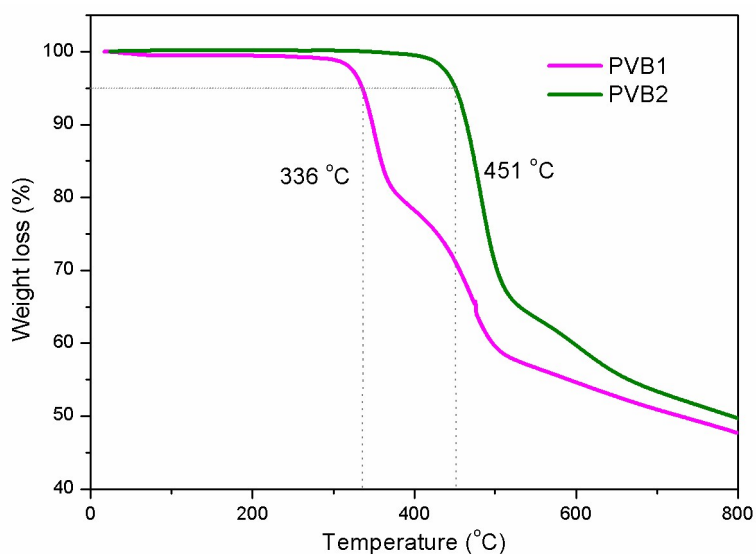

**Fig. S1** TGA curves of PVB1 and PVB2 at the heating rate of 10 °C min<sup>-1</sup> under nitrogen atmosphere.

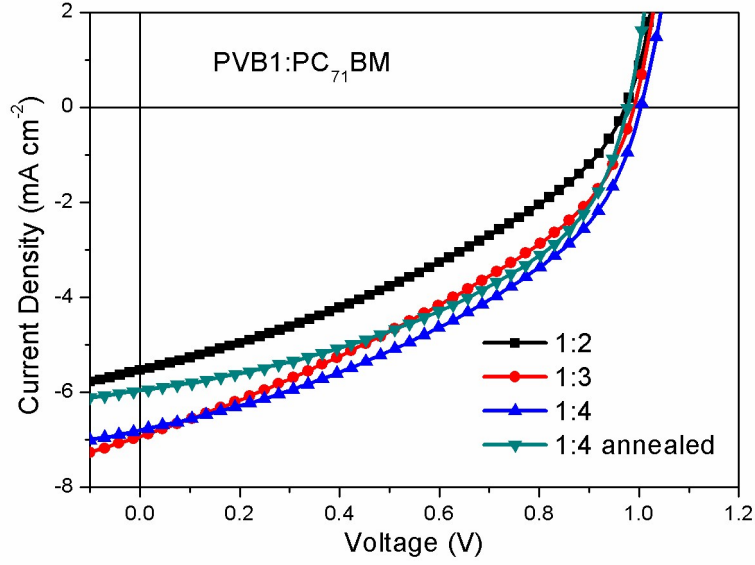

**Fig. S2**  $J$ - $V$  curves of PVB1:PC<sub>71</sub>BM with different weight ratios.

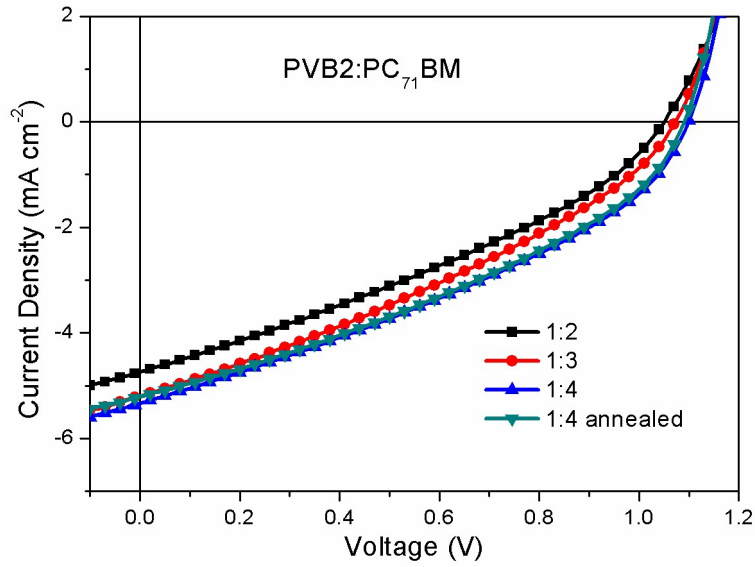

**Fig. S3**  $J$ - $V$  curves of PVB2:PC<sub>71</sub>BM with different weight ratios.

**Table S1.** Photovoltaic performance of PVB1 and PVB2 with PC<sub>71</sub>BM as the acceptor

|                          |                  | $V_{oc}$ (V) | $J_{sc}$ (mA cm <sup>-2</sup> ) | FF   | PCE (%) |
|--------------------------|------------------|--------------|---------------------------------|------|---------|
| PVB1:PC <sub>71</sub> BM | 1:2              | 0.97         | 5.53                            | 0.37 | 1.96    |
|                          | 1:3              | 0.99         | 6.93                            | 0.37 | 2.51    |
|                          | 1:4              | 1.00         | 6.80                            | 0.42 | 2.84    |
|                          | 1:4 <sup>a</sup> | 0.98         | 5.96                            | 0.45 | 2.64    |
| PVB2:PC <sub>71</sub> BM | 1:2              | 1.03         | 4.61                            | 0.32 | 1.55    |
|                          | 1:3              | 1.06         | 5.19                            | 0.33 | 1.84    |
|                          | 1:4              | 1.09         | 5.32                            | 0.35 | 2.05    |
|                          | 1:4 <sup>a</sup> | 1.08         | 5.21                            | 0.35 | 2.02    |

<sup>a</sup> annealed at 80 °C for 10 min.

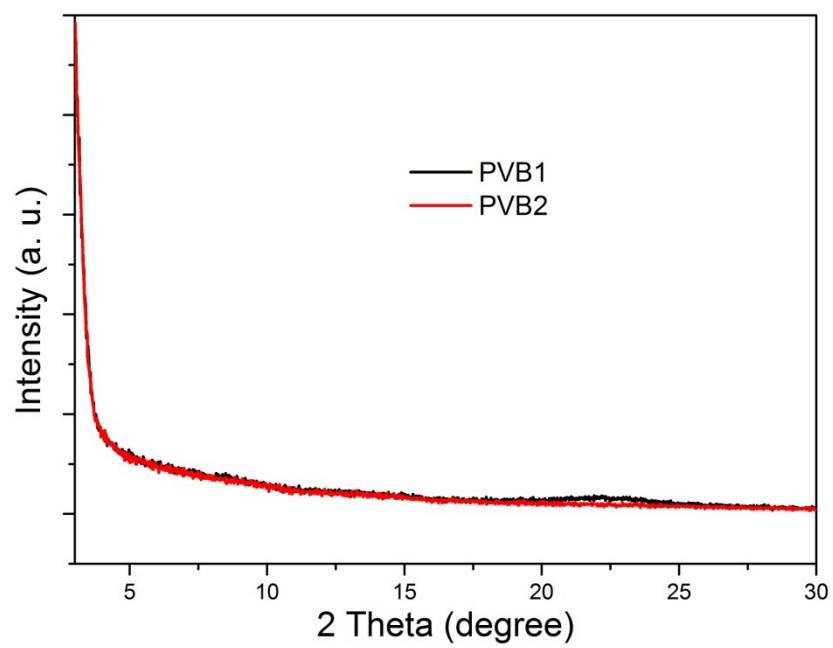

**Fig. S4** X-ray diffraction patterns of polymer:PC<sub>71</sub>BM blend films.
